# Supplementary material for: Disorganized Innervation and Neuronal Loss in the Inner Ear of Slitrk6-Deficient Mice
Source: PubMed Central journal article supplement (PMC2777407; doi:10.1371/journal.pone.0007786), 2009-11-11

Fig. S1

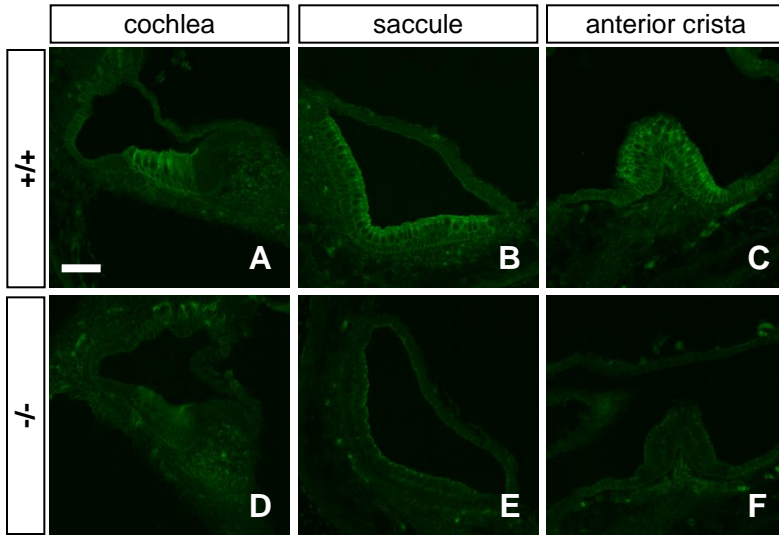

Supplement: pone.0007786.s002.pdf [file pone.0007786.s002.pdf]
